# Supplementary material for: “Ghost”, a Well-Known but Not Fully Explained Echocardiographic Finding during Transvenous Lead Extraction: Clinical Significance
Source: MDPI journal article supplement (doi:10.3390/ijerph191912542), 2022-10-01
Supplement: s1 [file s1]

Table S1: Indications for TLE, existing CIED and history of pacing.

| Indications for TLE, existing CIED and history of pacing                                                                                                                                                                                | Flying ghosts<br>(Ghosts shifting spontaneously to pulmonary vascular bed) | Stable ghosts<br>(Ghosts remaining attached to cardiovascular wall) | Ghosts absent during and after TLE   |
|-----------------------------------------------------------------------------------------------------------------------------------------------------------------------------------------------------------------------------------------|----------------------------------------------------------------------------|---------------------------------------------------------------------|--------------------------------------|
| Group / number of patients                                                                                                                                                                                                              | 1: N=171                                                                   | 2: N=322                                                            | 3: N=610                             |
| Forms of results presentation                                                                                                                                                                                                           | mean $\pm$ SD / n (%)<br>P (1 vs. 2)                                       | mean $\pm$ SD / n (%)<br>P (2 vs. 3)                                | mean $\pm$ SD / n (%)<br>P (1 vs. 3) |
| TLE indications                                                                                                                                                                                                                         |                                                                            |                                                                     |                                      |
| Systemic infection                                                                                                                                                                                                                      | 15 (8.77)<br>P=0.004                                                       | 62 (19.26)<br>P=0.229                                               | 97 (15.90)<br>P=0.026                |
| Local (pocket) infection                                                                                                                                                                                                                | 6 (3.51)<br>P=0.349                                                        | 19 (5.90)<br>P=0.730                                                | 41 (6.72)<br>P=0.159                 |
| Noninfectious indications (lead dysfunction, change of mode pacing, abandoned lead, threatening / potentially threatening lead, MRI indication, cancer, painful pocket, loss of indications for pacing / ICD), regaining venous access) | 150 (87.72)<br>P<0.001                                                     | 241 (74.84)<br>P=0.432                                              | 472 (74.84)<br>P=0.004               |
| Lead dysfunction (any reason)                                                                                                                                                                                                           | 98 (57.31)<br>0.890                                                        | 181 (56.22)<br>0.987                                                | 344 (56.39)<br>0.899                 |
| Other indications (change of mode pacing, abandoned lead, threatening / potentially threatening lead, MRI indication, cancer, painful pocket, loss of indications for pacing / ICD), regaining venous access)                           | 52 (30.41)<br>P=0.004                                                      | 60 (18.63)<br>P=0.0595                                              | 124 (20.65)<br>P=0.007               |
| Change of pacing mode/ upgrading, downgrading                                                                                                                                                                                           | 24 (14.04)<br>P=0.004                                                      | 19 (5.90)<br>P=0.730                                                | 41 (6.72)<br>P=0.004                 |
| Other indications (abandoned lead, threatening / potentially threatening lead, MRI indication, cancer, painful pocket, loss of indications for pacing / ICD), regaining venous access)                                                  | 28 (16.37)<br>P=0.331                                                      | 41 (12.73)<br>P=0.786                                               | 83 (13.93)<br>P=0.428                |
| Existing CIED and history of pacing                                                                                                                                                                                                     |                                                                            |                                                                     |                                      |
| Device type – PM: AAI,VVI,VDD (single lead)                                                                                                                                                                                             | 34 (19.88)<br>P=0.017                                                      | 37 (11.49)<br>P<0.001                                               | 143 (23.44)<br>P=0.379               |
| Device type – PM: DDD (dual lead)                                                                                                                                                                                                       | 82 (47.95)<br>P<0.001                                                      | 181 (56.21)<br>P<0.001                                              | 259 (42.46)<br>P=0.233               |
| Device type - CRT-P (three leads)                                                                                                                                                                                                       | 9 (5.26)<br>P=0.115                                                        | 7 (2.17)<br>P=0.846                                                 | 13 (2.13)<br>P=0.054                 |
| Device type - ICD (VVI, DDD)                                                                                                                                                                                                            | 32 (18.71)<br>P=0.849                                                      | 64 (19.88)<br>P=0.245                                               | 143 (23.44)<br>P=0.227               |

|                                                                 |                        |                        |                        |
|-----------------------------------------------------------------|------------------------|------------------------|------------------------|
| Device type - CRT-D                                             | 13 (7.60)<br>P=0.474   | 33 (10.25)<br>P=403    | 51 (8.36)<br>P=0.872   |
| Number of leads in the system before TLE [n]                    | 1.871±0.592<br>P=0.384 | 1.929±0.599<br>P<0.001 | 1.777±0.630<br>P=0.099 |
| Abandoned lead before TLE                                       | 14 (8.19)<br>P=0.142   | 42 (13.04)<br>P=0.012  | 47 (7.71)<br>P=0.963   |
| Number of leads in the heart before TLE [n]                     | 1.965±0.719<br>P=0.104 | 2.084±0.699<br>P<0.001 | 1.861±0.703<br>P=0.129 |
| HV lead before TLE                                              | 45 (26.13)<br>P=0.433  | 97 (30.12)<br>P=0.546  | 197 (32.30)<br>P=0.161 |
| CS lead before TLE                                              | 30 (17.54)<br>P=0.266  | 43 (13.35)<br>P=0.539  | 92 (10.08)<br>P=0.506  |
| Excessive lead looping due to lead fracture or ligature failure | 5 (2.92)<br>P=0.403    | 16 (5.00)<br>P=0.127   | 17 (2.80)<br>P=0.868   |
| Number of procedures before lead extraction [n]                 | 2.229±1.281<br>P=0.418 | 1.906±0.938<br>P=0.050 | 1.849±0.949<br>P=0.015 |
| Dwell time of oldest lead in the patient before TLE [months]    | 150.7±89.53<br>P<0.001 | 115.1±81.93<br>P=0.788 | 114.8±78.85<br>P<0.001 |
| Mean implant duration before TLE [months]                       | 142.0±81.74<br>P<0.001 | 104.1±69.99<br>P=0.582 | 108.2±71.36<br>P<0.001 |
| Cumulative lead dwell time before TLE [years]                   | 23.17±16.60<br>P<0.001 | 18.37±14.42<br>P=0.136 | 17.01±14.06<br>P<0.001 |

TLE – transvenous lead extraction, CIED – cardiac implantable electric device, SD – standard deviation, [n] – number, PM – pacemaker, AAI – single chamber pacemaker with atrial lead, VVI, VDD – single chamber pacemakers with ventricular lead, PM DDD – dual chamber pacemaker, CRT-P – cardiac resynchronization pacemaker, ICD – implantable cardioverter defibrillator, CRTD – cardiac resynchronization cardioverter defibrillator, HV lead – defibrillation leads, CS lead – coronary sinus lead

Table S2: TLE-related potential risk factors for major complications, procedure complexity and TLE efficacy and complications.

| TLE-related potential risk factors for major complications, procedure complexity and TLE efficacy and complications | Flying ghosts<br>(Ghosts shifting spontaneously to pulmonary vascular bed) | Stable ghosts<br>(Ghosts remaining attached to cardiovascular wall) | Ghosts absent during and after TLE   |
|---------------------------------------------------------------------------------------------------------------------|----------------------------------------------------------------------------|---------------------------------------------------------------------|--------------------------------------|
| Group / number of patients                                                                                          | 1: N=171                                                                   | 2: N=322                                                            | 3: N=610                             |
| Forms of results presentation                                                                                       | mean $\pm$ SD / n (%)<br>P (1 vs. 2)                                       | mean $\pm$ SD / n (%)<br>P (2 vs. 3)                                | mean $\pm$ SD / n (%)<br>P (1 vs. 3) |
| TLE-related potential risk factors for major complications and procedure complexity                                 |                                                                            |                                                                     |                                      |
| Number of extracted leads in one patient [n]                                                                        | 1.784 $\pm$ 0.740<br>P=0.778                                               | 1.795 $\pm$ 0.729<br>P<0.001                                        | 1.607 $\pm$ 0.680<br>P=0.013         |
| Extraction of lead with excessive loop                                                                              | 3 (1.75)<br>P=0.348                                                        | 12 (3.73)<br>P=0.461                                                | 16 (2.62)<br>P=0.711                 |
| Extraction of abandoned lead(s) (any)                                                                               | 14 (8.19)<br>P=0.614                                                       | 41 (12.73)<br>P=0.004                                               | 42 (6.89)<br>P=0.678                 |
| Extraction of abandoned lead(s) [n]                                                                                 | 0.111 $\pm$ 0.398<br>P<0.001                                               | 0.152 $\pm$ 0.423<br>P=0.256                                        | 0.084 $\pm$ 0.336<br>P=0.657         |
| Longest target lead dwell time [months]                                                                             | 147.1 $\pm$ 88.54<br>P<0.001                                               | 114.5 $\pm$ 82.10<br>P=0.866                                        | 113.9 $\pm$ 78.63<br>P<0.001         |
| Average (in the patient) target lead dwell time [months]                                                            | 140.3 $\pm$ 81.83<br>P<0.001                                               | 106.1 $\pm$ 70.77<br>P=0.606                                        | 108.9 $\pm$ 71.97<br>P<0.001         |
| Cumulative target lead dwell time [years]                                                                           | 21.79 $\pm$ 17.15<br>P<0.001                                               | 17.05 $\pm$ 14.68<br>P=0.128                                        | 15.39 $\pm$ 13.84<br>P<0.001         |
| SAFeTY calculator of risk of TLE major complications [%]                                                            | 3.114 $\pm$ 5.513<br>P=0.709                                               | 2.189 $\pm$ 2.893<br>P=0.016                                        | 1.960 $\pm$ 2.898<br>P=0.299         |
| TLE procedure complexity                                                                                            |                                                                            |                                                                     |                                      |
| Procedure duration (sheath-to-sheath) [minutes]                                                                     | 19.24 $\pm$ 31.66<br>P=0.126                                               | 18.85 $\pm$ 30.85<br>P=0.017                                        | 13.36 $\pm$ 18.07<br>P<0.001         |
| Average time of single lead extraction (sheath-to-sheath) / number of extracted leads) [minutes]                    | 9.755 $\pm$ 10.36<br>P=0.060                                               | 10.85 $\pm$ 21.20<br>P=0.735                                        | 8.205 $\pm$ 11.51<br>P=0.006         |
| Technical problem during TLE (any)                                                                                  | 53 (30.99)<br>P=0.293                                                      | 84 (26.09)<br>P=0.399                                               | 136 (22.30)<br>P=0.025               |
| Number of big technical problems [n]                                                                                | 1.510 $\pm$ 0.982<br>P=0.266                                               | 1.577 $\pm$ 0.889<br>P=0.258                                        | 1.373 $\pm$ 0.884<br>P=0.060         |
| TLE efficacy and complications                                                                                      |                                                                            |                                                                     |                                      |
| Major complications (any)                                                                                           | 7 (4.09)<br>P=0.086                                                        | 4 (1.24)<br>P=0.252                                                 | 16 (2.62)<br>P=0.562                 |
| Hemopericardium                                                                                                     | 12 (7.01)<br>P<0.001                                                       | 1 (0.311)<br>P=0.079                                                | 12 (1.97)<br>P=0.002                 |
| Tricuspid valve damage during TLE                                                                                   | 4 (2.34)<br>P=0.391                                                        | 3 (0.932)<br>P=0.466                                                | 2 (0.33)<br>P=0.033                  |
| Rescue cardiac surgery                                                                                              | 3 (1.75)<br>P=0.241                                                        | 1 (0.311)<br>P=0.044                                                | 14 (2.30)<br>P=0.895                 |

|                                                                     |                        |                        |                        |
|---------------------------------------------------------------------|------------------------|------------------------|------------------------|
| Minor complications (any)                                           | 9 (5.26)<br>P=0.277    | 27 (8.70)<br>P=0.371   | 40 (6.56)<br>P=0.661   |
| Procedure-related death (intra-, post-procedural)                   | 0 (0.00)<br>MN         | 0 (0.00)<br>MN         | 0 (0.00)<br>MN         |
| Indication-related death (intra-, post-procedural)                  | 0 (0.00)<br>MN         | 0 (0.00)<br>MN         | 0 (0.00)<br>MN         |
| Partial radiological success (remained tip or < 4 cm lead fragment) | 9 (5.26)<br>P=0.270    | 14 (4.38)<br>P=0.221   | 16 (2.63)<br>P=0.137   |
| Complete clinical success                                           | 166 (97.08)<br>P=0.196 | 319 (99.07)<br>P=0.948 | 606 (99.34)<br>P=0.040 |
| Complete procedural success                                         | 159 (92.98)<br>P=0.562 | 305 (94.72)<br>P=0.681 | 592 (97.05)<br>P=0.019 |

TLE – transvenous lead extraction, SD – standard deviation, N – number, CVS – cardiovascular system, MN – methodologically noncomparable

Table S3: TEE findings before, during and after TLE with special focus on the presence of all forms of scar tissue and mortality after TLE

| TEE findings before, during and after TLE with special focus on the presence of all forms of scar tissue and mortality after TLE | Flying ghosts<br>(Ghosts shifting spontaneously to pulmonary vascular bed) | Stable ghosts<br>(Ghosts remaining attached to cardiovascular wall) | Ghosts absent during and after TLE   |
|----------------------------------------------------------------------------------------------------------------------------------|----------------------------------------------------------------------------|---------------------------------------------------------------------|--------------------------------------|
| Group / number of patients                                                                                                       | 1: N=171                                                                   | 2: N=322                                                            | 3: N=610                             |
| Forms of results presentation                                                                                                    | mean $\pm$ SD / n (%)<br>P (1 vs. 2)                                       | mean $\pm$ SD / n (%)<br>P (2 vs. 3)                                | mean $\pm$ SD / n (%)<br>P (1 vs. 3) |
| Masses on lead (any)                                                                                                             |                                                                            |                                                                     |                                      |
| Scar tissue surrounding the lead                                                                                                 | 62 (36.257)<br>P=0.008                                                     | 63 (19.57)<br>P<0.001                                               | 65 (10.66)<br>P<0.001                |
| Blood clot on the lead (mobile thrombi)                                                                                          | 31 (18.13)<br>P=0.014                                                      | 32 (9.94)<br>P<0.001                                                | 23 (3.77)<br>P<0.001                 |
| Vegetation-like masses                                                                                                           | 15 (8.77)<br>P=0.050                                                       | 13 (4.04)<br>P=0.026                                                | 9 (1.48)<br>P<0.001                  |
| Lead thickening                                                                                                                  | 85 (49.71)<br>P=0.003                                                      | 114 (35.40)<br>P=0.054                                              | 177 (29.00)<br>P<0.001               |
| True vegetation                                                                                                                  | 12 (7.02)<br>P=0.016                                                       | 48 (14.91)<br>P=0.559                                               | 81 (13.28)<br>P=0.036                |
| Lead adhesion to heart structures (any)                                                                                          | 75 (43.86)<br>P=0.012                                                      | 103 (31.99)<br>P<0.001                                              | 131 (21.48)<br>P<0.001               |
| Lead adhesion to tricuspid apparatus                                                                                             | 27 (15.79)<br>P=0.887                                                      | 41 (12.73)<br>P=0.036                                               | 50 (8.20)<br>P<0.001                 |
| Lead adhesion to SVC                                                                                                             | 37 (21.64)<br>P<0.001                                                      | 22 (6.83)<br>P=0.402                                                | 32 (5.25)<br>P<0.001                 |
| Lead adhesion to RA wall                                                                                                         | 32 (18.71)<br>P<0.004                                                      | 30 (9.14)<br>P=0.112                                                | 38 (6.23)<br>P<0.001                 |
| Lead adhesion to RV wall                                                                                                         | 35 (20.470)<br>P=0.177                                                     | 49 (15.22)<br>P=0.031                                               | 62 (10.16)<br>P<0.001                |
| Lead-to-lead binding                                                                                                             | 52 (30.41)<br>P=0.146                                                      | 77 (23.91)<br>P<0.001                                               | 89 (14.59)<br>P<0.001                |
| Spread of scar tissue in CVS                                                                                                     |                                                                            |                                                                     |                                      |
| Presence of scars (thickening, floating scar, adhesion to SVC, RA, TV, RV, another lead) (all)                                   | 131 (76.61)<br>P=0.066                                                     | 206 (63.98)<br>P<0.001                                              | 289 (47.46)<br>P<0.001               |
| Number of separate scars (thickening, floating scar, adhesion to SVC, RA, TV, RV, another lead)                                  |                                                                            |                                                                     |                                      |
| Lack of any form of scar tissue                                                                                                  | 40 (23.39)<br>P=0.008                                                      | 116 (36.03)<br>P<0.001                                              | 321 (52.62)<br>P<0.001               |
| 1 scar tissue manifestation                                                                                                      | 43 (25.15)<br>P=0.396                                                      | 94 (29.19)<br>P=0.318                                               | 158 (25.94)<br>P=0.920               |
| 2 scar tissue manifestations                                                                                                     | 30 (17.54)<br>P=0.795                                                      | 61 (18.94)<br>P=0.016                                               | 78 (12.81)<br>P=0.142                |
| 3 scar tissue manifestations                                                                                                     | 35 (20.47)                                                                 | 31 (9.63)                                                           | 31 (5.09)                            |

|                                            |                      |                      |                      |
|--------------------------------------------|----------------------|----------------------|----------------------|
|                                            | P<0.001              | P=0.012              | P<0.001              |
| 4 scar tissue manifestations               | 13 (7.60)<br>P=0.192 | 14 (4.34)<br>P=0.419 | 17 (2.79)<br>P=0.008 |
| 5 scar tissue manifestations               | 6 (3.51)<br>P=0.281  | 5 (1.55)<br>P=0.485  | 5 (0.821)<br>P=0.023 |
| 6 scar tissue manifestations               | 3 (1.75)<br>P=0.261  | 1 (0.311)<br>P=0.745 | 0 (0.00)<br>P=0.002  |
| TLE-related tricuspid valve dysfunction    |                      |                      |                      |
| Increased TR by 2 degrees                  | 3 (1.75)<br>P=0.034  | 21 (6.52)<br>P<0.001 | 3 (0.492)<br>P=0.240 |
| Increased TR by 3 degrees                  | 4 (2.34)<br>P=0.026  | 0 (0.00)<br>P=0.776  | 2 (0.328)<br>P=0.030 |
| Increased TR by 2 degrees & up to grade IV | 4 (2.34)<br>P=0.391  | 3 (0.932)<br>P=0.466 | 2 (0.328)<br>P=0.030 |
| Damage to tendinous cords during TLE       | 7 (4.09)<br>P=0.613  | 18 (5.59)<br>P=0.005 | 12 (1.97)<br>P=0.188 |

TEE – transoesophageal echocardiography, TLE – transvenous lead extraction, SD – standard deviation, N / [n] – number, CVS – cardiovascular system, SVC –superior vena cava, RA – right atrium, TV – tricuspid valve, RV – right ventricle, MN – methodologically noncomparable, TR – tricuspid regurgitation
